# Supplementary material
Source: PubMed Central journal article supplement (PMC3908483)
Supplement: NIHMS508284-supplement-1.pdf [file NIHMS508284-supplement-1.pdf]

## **SUPPLEMENTAL MATERIAL**

**Table S1. Characteristics of patients missing 6-month follow-up**

|                                                                  | Overall<br>(n=7347)  | Patients with<br>Follow-up<br>(n=6540) | Patients<br>without Follow-<br>up<br>(n=807) | p-Value           |
|------------------------------------------------------------------|----------------------|----------------------------------------|----------------------------------------------|-------------------|
| OAC+ASA                                                          | 35                   | 35                                     | 30                                           | <b>0.003</b>      |
| Age                                                              | 75 (68-82)           | 76 (68-82)                             | 74 (66-81)                                   | <b>0.02</b>       |
| Female                                                           | 43                   | 43                                     | 40                                           | 0.1               |
| Race                                                             |                      |                                        |                                              | <b>0.02</b>       |
| White                                                            | 89                   | 89                                     | 87                                           |                   |
| Black or African American                                        | 4.8                  | 4.5                                    | 6.9                                          |                   |
| Hispanic                                                         | 4.5                  | 4.5                                    | 4.3                                          |                   |
| Past Medical History                                             |                      |                                        |                                              |                   |
| Smoking                                                          | 48                   | 49                                     | 43                                           | <b>0.002</b>      |
| Hypertension                                                     | 85                   | 85                                     | 83                                           | 0.2               |
| Hyperlipidemia                                                   | 72                   | 73                                     | 66                                           | <b>&lt;0.0001</b> |
| Diabetes                                                         | 30                   | 30.1                                   | 30.4                                         | 0.9               |
| Obstructive Sleep Apnea                                          | 18.5                 | 18.9                                   | 15.7                                         | <b>0.03</b>       |
| Heart Failure                                                    | 34                   | 34                                     | 30                                           | <b>0.02</b>       |
| Gastrointestinal Bleeding                                        | 7.8                  | 8.0                                    | 6.6                                          | 0.2               |
| Anemia                                                           | 17                   | 18                                     | 14                                           | <b>0.02</b>       |
| Chronic Obstructive<br>Pulmonary Disease                         | 16                   | 16                                     | 14                                           | 0.1               |
| Hemoglobin (g/dl)                                                | 13.5 (12.3-<br>14.6) | 13.5 (12.3-14.6)                       | 13.5 (12.3-<br>14.8)                         | 0.6               |
| Calculated creatinine clearance<br>(mL/min/1.73m <sup>2</sup> )* | 70 (51-97)           | 70 (51-96)                             | 70 (50-101)                                  | 0.4               |
| LVEF (%), mean (SD)                                              | 54.3 (12)            | 54.3 (12)                              | 54.4 (12)                                    | 0.7               |
| CHADS <sub>2</sub> Score                                         |                      |                                        |                                              | <b>0.02</b>       |
| 0                                                                | 4.6                  | 4.6                                    | 5.1                                          |                   |
| 1                                                                | 21                   | 20                                     | 24                                           |                   |
| >2                                                               | 75                   | 75                                     | 71                                           |                   |
| CHA <sub>2</sub> DS <sub>2</sub> -VASa Score                     |                      |                                        |                                              | 0.07              |
| 0                                                                | 1.3                  | 1.2                                    | 1.6                                          |                   |
| 1                                                                | 5.4                  | 5.3                                    | 6.2                                          |                   |
| >2                                                               | 85                   | 86                                     | 81                                           |                   |
| ATRIA Score                                                      |                      |                                        |                                              | <b>0.003</b>      |
| Low (0-3)                                                        | 75                   | 75                                     | 71                                           |                   |
| Intermediate (4)                                                 | 8.6                  | 8.2                                    | 11                                           |                   |
| High (5+)                                                        | 17                   | 17                                     | 18                                           |                   |
| Any Vascular History (CAD,<br>PAD, or CVD)                       | 45                   | 45                                     | 43                                           | 0.3               |
| CAD                                                              |                      |                                        |                                              |                   |

|                                                 | Overall<br>(n=7347) | Patients with<br>Follow-up<br>(n=6540) | Patients<br>without Follow-<br>up<br>(n=807) | p-Value |
|-------------------------------------------------|---------------------|----------------------------------------|----------------------------------------------|---------|
| Prior MI                                        | 14                  | 14                                     | 13                                           | 0.2     |
| Prior CABG                                      | 14                  | 14                                     | 13                                           | 0.3     |
| Prior PCI                                       | 14                  | 15                                     | 13                                           | 0.1     |
| Prior DES                                       | 4.7                 | 4.7                                    | 4.3                                          | 0.6     |
| Prior Cerebrovascular Events<br>(stroke or TIA) | 16                  | 16                                     | 17                                           | 0.4     |
| Stroke – non-hemorrhagic                        | 8.7                 | 8.5                                    | 9.8                                          | 0.2     |
| Stroke – hemorrhagic                            | 0.6                 | 0.5                                    | 1.0                                          | 0.1     |
| TIA                                             | 8.7                 | 8.7                                    | 8.8                                          | 1.0     |

Baseline characteristics, co-morbidities, admission data, and laboratory studies, stratified by availability of follow-up.

Values are presented as % or median (interquartile range).

OAC+ASA: oral anticoagulation and aspirin therapy; LVEF: left-ventricular ejection fraction;

CAD: coronary artery disease; MI: myocardial infarction; CABG: coronary artery bypass grafting;

PCI: percutaneous coronary intervention; DES: drug-eluting stent; TIA: transient ischemic attack.
